# Supplementary material for: Bioelectric and Epigenetic Landscapes in Lateralized Breast Tumors Reveal Distinct Tumor Microenvironment Signatures
Source: bioRxiv preprint, doi:10.1101/2025.06.30.662430, version 1 (2025-07-04)
Supplement: Gene list detail 2 [file 662430_file03.xlsx]

## Sheet: Hoja1
CAF subtype	TOP 6 GENES FROM Cords et al (Ref 28)
Inflammatory, iCAF	CFD, PLA2G2A, APOD, PI16, CXCL14, PRG4
Dividing, dCAF	CFD, PLA2G2A, APOD, PI16, CXCL14, PRG4
Vascular, vCAF	MYH11, RERGL, ADIRF, ACTA2, BCAM, MCAM
Matrix, mCAF	MMP11, POSTN, COL1A1, COMP, COL10A1, COL11A1
Hsp, hspCAF	HSPH1, VEGFA, CCNL1, VMP1, SAT1, CCL5
Rare, rCAF	IGKC, CCL21, IGFBP5, CCL2, C2ORF40, APOE
Tumor, tCAF	ENO1, BNIP3, GAPDH, PGK1, NDRG1, TMEM158
